# Supplementary material for: Aqueous synthesis of composition-tuned defects in CuInSe2 nanocrystals for enhanced visible-light photocatalytic H2 evolution
Source: Royal Society of Chemistry journal article supplement (doi:10.1039/d1na00069a), 2021-01-01
Supplement: d1na00069a1.pdf [file d1na00069a1.pdf]

## SUPPORTING INFORMATION

### AQUEOUS SYNTHESIS OF COMPOSITION TUNED DEFECTS OF CUINSE<sub>2</sub> NANOCRYSTALS FOR ENHANCED VISIBLE-LIGHT PHOTOCATALYTIC H<sub>2</sub> EVOLUTION

Senlin Qu,<sup>a</sup> Xin Yuan,<sup>a</sup> Yu Li,<sup>a</sup> Xingyang Li,<sup>a</sup> Xiujuan Zhou,<sup>a</sup> Xiaogang Xue,<sup>a,b,\*</sup> Kexiang Zhang,<sup>a</sup> Juan Xu,<sup>a</sup> Changlai Yuan<sup>a,\*</sup>.

a. School of Materials Science and Engineering, Guangxi Key Laboratory of Information Materials, Guilin University of Electronic Technology, Guilin 541004, People's Republic of China.

b. State Key Laboratory of Structural Chemistry, Fujian Institute of Research on the Structure of Matter, Chinese Academy of Sciences, Fuzhou, Fujian 350002, P. R.

\*Corresponding author. Tel: 86-0773-2290810; fax: 86-86-0773-2290810.

E-mail address: [liangzixue@163.com](mailto:liangzixue@163.com)

Table of Contents:

Table

Table S1. EDS apparent concentration of CISE QDs with various Cu/In ratios

Table S2. PL life time of CISE QDs with various Cu/In ratios

Table S3 The E<sub>x</sub>, E<sub>g</sub> and J<sub>e/h</sub> of CISE QDs with various Cu/In ratios

Figure

Figure S1. EDS of CISE-1/4 nucleus

Figure S2. EDS of CISE-1/2

Figure S3. EDS of CISE-1/4

Figure S4. EDS of CISE-1/8

Figure S5. EDS of CISE-1/16

Figure S6. PL spectra peak separation fitting of CISE-1/4

Figure S7. PL life time of CISE-1/4 at emission of 620 nm

Figure S8. The flat band potential (E<sub>fb</sub>) of CISE QDs with various Cu/In ratios

Figure S9. The PHE of CISE-1/4 nucleus and the coarsened sample (at 180 ° C for 60 hours)

Figure S10. CISE-1/4 nucleus of UV-absorption spectra, band gap evaluated from tauc plots, cyclic voltammetry curves of E<sup>OX</sup> and E<sup>RED</sup>, the flat band potential

Figure S11. Cyclic voltammetry curves of brae glassy carbon electrode

Figure S12. The linear sweep voltammetric curves of CISE-1/2, CISE-1/4, CISE-1/8 and CISE-1/16, the stability of photoelectrochemical activity of CISE-1/4

Table

**Table S1. The EDS apparent concentration of CISE QDs with various Cu/In ratios**

| sample           | Cu   | In    | Cu/In |
|------------------|------|-------|-------|
| CISE-1/4 nucleus | 4.12 | 21.04 | 0.195 |
| CISE-1/16        | 0.64 | 10.37 | 0.061 |
| CISE-1/8         | 1.55 | 13.60 | 0.114 |
| CISE-1/4         | 2.76 | 12.63 | 0.218 |
| CISE-1/2         | 2.41 | 5.52  | 0.436 |

**Table S2. PL life time by fitting experimental data with double exponential model of CISe**

| sample             | $\tau_1$ (ns) | %     | $\tau_2$ (ns) | %     | $\tau$ (ns) |
|--------------------|---------------|-------|---------------|-------|-------------|
| CISe-1/4 (620 nm)  | 23.33         | 12.40 | 192.13        | 87.60 | 171.19      |
| CISe-1/4 (760 nm)  | 33.88         | 9.97  | 254.05        | 90.03 | 232.09      |
| CISe-1/8 (620 nm)  | 28.29         | 18.92 | 179.6         | 81.08 | 150.97      |
| CISe-1/16 (610 nm) | 4.91          | 48.29 | 44.18         | 51.71 | 25.21       |

**Table S3. The  $E_{\text{gap}}^{\text{el}}$ ,  $E_{\text{gap}}^{\text{opt}}$  and  $J_{\text{e/h}}$  of CISe QDs with various Cu/In ratios**

| sample                                                   | CISe-1/4 nucleus | 1/16 | 1/8  | 1/4  | 1/2  |
|----------------------------------------------------------|------------------|------|------|------|------|
| $E_{\text{gap}}^{\text{el}}$ (determined by CV eV)       | 2.57             | 2.20 | 2.14 | 2.21 | 2.02 |
| $E_{\text{gap}}^{\text{opt}}$ (determined by absorption) | 3.1              | 2.43 | 2.36 | 2.23 | 2.18 |
| $J_{\text{e/h}}$                                         | 0.53             | 0.23 | 0.22 | 0.02 | 0.16 |

Figure

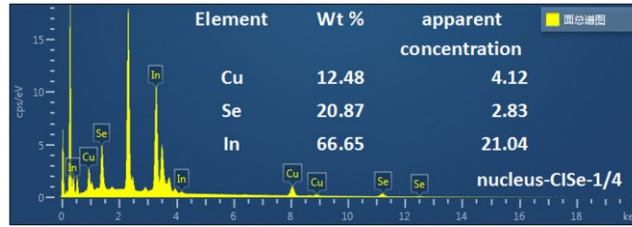

Figure S1.EDS of CISe-1/4 nucleus

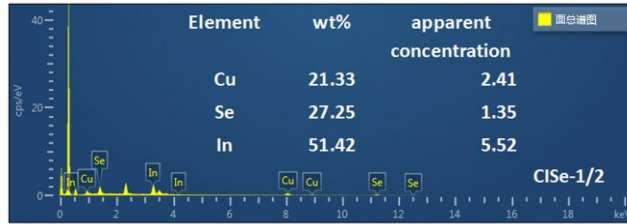

Figure S2.EDS of CISe-1/2

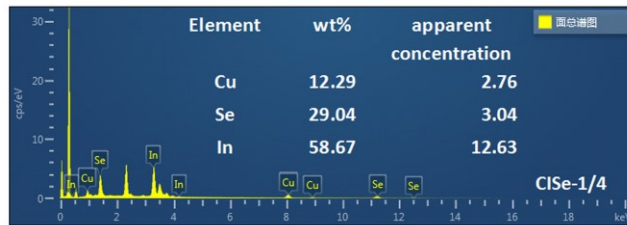

Figure S3.EDS of CISe-1/4

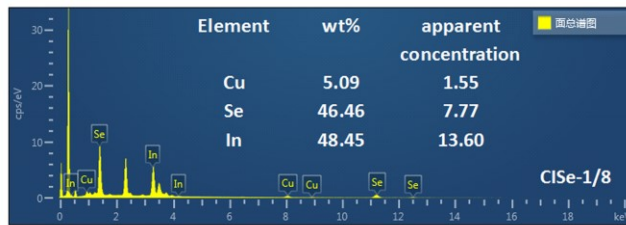

Figure S4.EDS of CISE-1/8

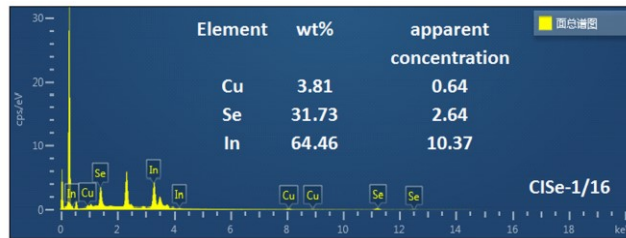

Figure S5.EDS of CISE-1/16

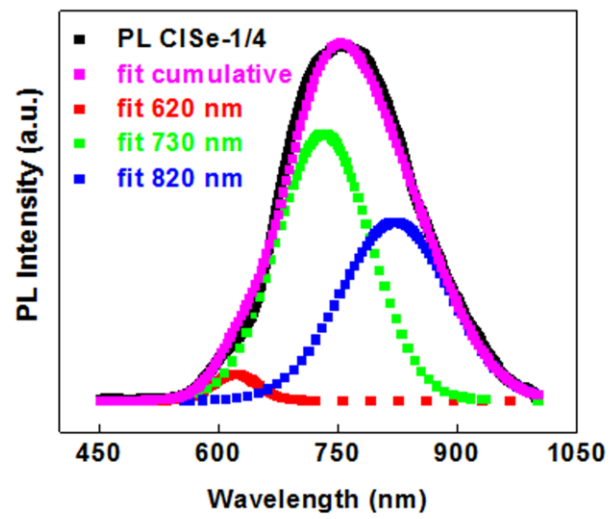

Figure S6. PL spectra peak separation fitting of CISE-1/4

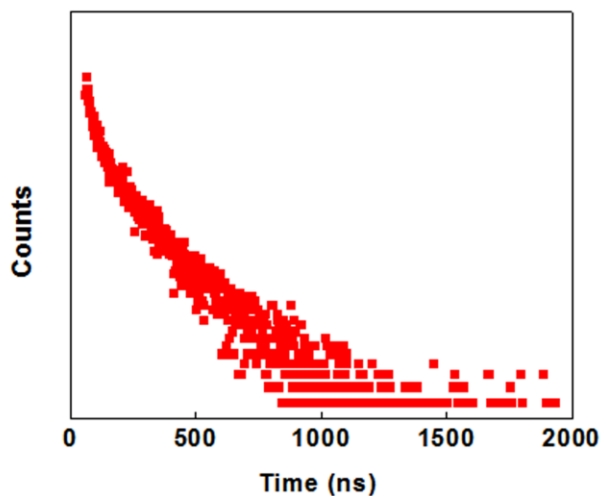

Figure S7. PL life time of CISe-1/4 at emission of 620 nm

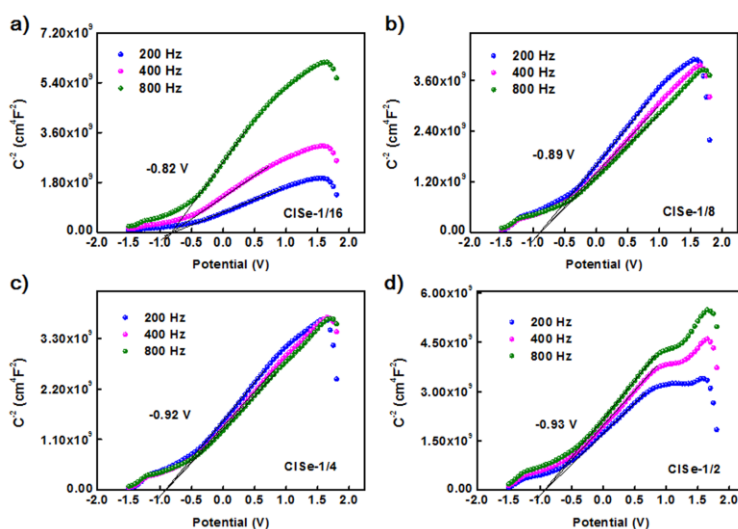

Figure S8.  $E_{it}$  of CISe QDs with various Cu/In ratios (VS  $Ag/Ag^+$ ): CISe-1/16 at (a), CISe-1/8 at (b), CISe-1/4 at (c), CISe-1/2 at (d).

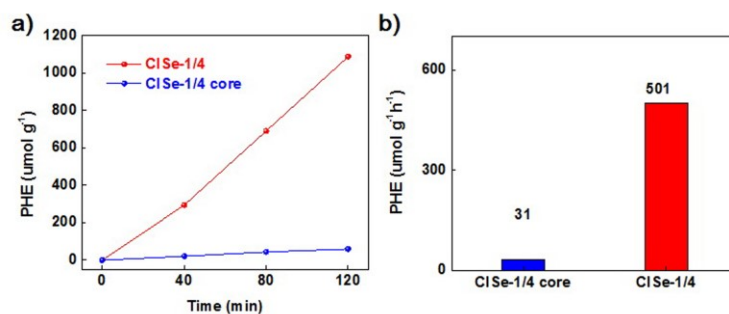

Figure S9. The PHE of CISe-1/4 nucleus and the coarsened sample (at 180 ° C for 60 hours)

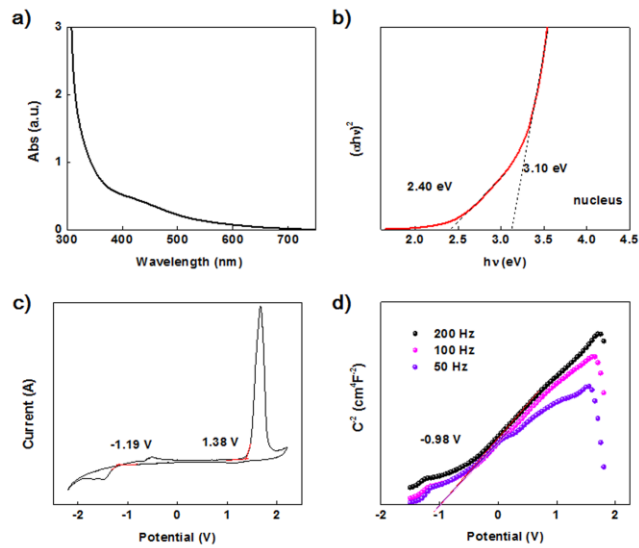

Figure S10. CISE-1/4 nucleus of UV-absorption spectra at (a), band gap evaluated from Tauc plots at (b), cyclic voltammetry curves of  $E^{OX}$  and  $E^{RED}$  at (c), the flat band potential at (d)

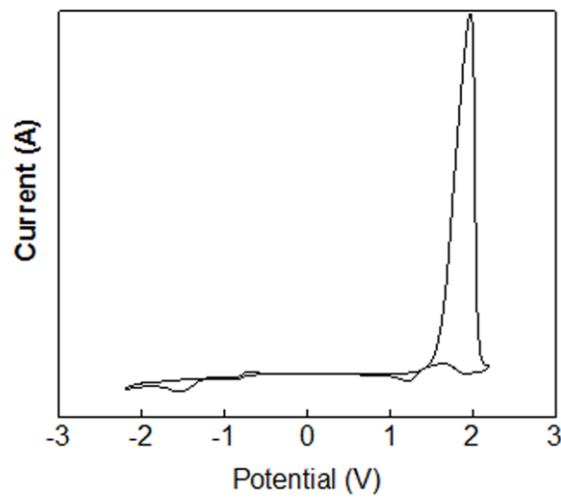

Figure S11. Cyclic voltammetry curves of bare glassy carbon electrode

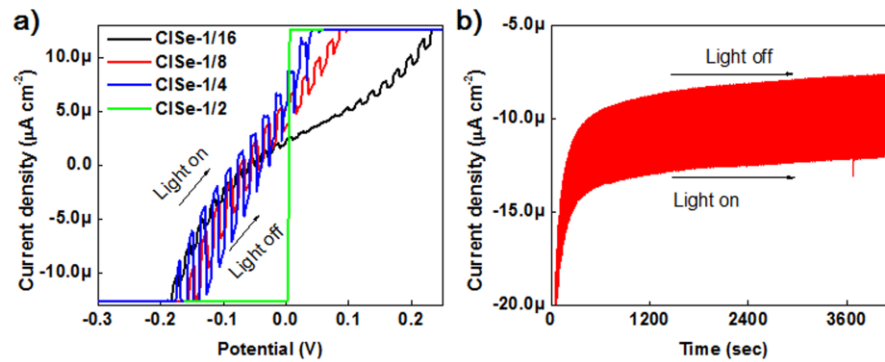

Figure S12. a) The linear sweep voltammetric (LSV) curves of CISE-1/2, CISE-1/4, CISE-1/8 and CISE-1/16, b) the stability of photoelectrochemical activity of CISE-1/4
